# Supplementary material
Source: PubMed Central journal article supplement (PMC3117171)
Supplement: mmc1.pdf [file mmc1.pdf]

## Supplementary Information

### Isolating toxic insulin amyloid reactive species that lack $\beta$ -sheets and have wide pH stability

Caryn L. Heldt<sup>a,c</sup>, Dmitry Kurouski<sup>b</sup>, Mirco Sorci<sup>a</sup>, Elizabeth Grafeld<sup>a</sup>, Igor K. Lednev<sup>b</sup>, and Georges Belfort<sup>a,#</sup>

<sup>a</sup>Howard P. Isermann Department of Chemical Engineering and  
The Center of Biotechnology and Interdisciplinary Studies  
Rensselaer Polytechnic Institute, 110 8<sup>th</sup> Street, Troy NY 12180

<sup>b</sup>Department of Chemistry  
University at Albany, SUNY, 1400 Washington Ave., Albany NY 12222

<sup>c</sup>Current address: Department of Chemical Engineering, Michigan Technological University, 1400 Townsend Dr., Houghton MI 49931

#Corresponding author: Georges Belfort [belfog@rpi.edu](mailto:belfog@rpi.edu); Phone: (518) 276-6948

### Guinier Analysis

The Guinier analysis is a model-independent method (it does not require an a priori knowledge about the sample) which includes a linearized fitting of the SANS data to extract structural information of the sample. Using the Guinier approximation (1)  $I(Q)$ , the scattered intensity, can be expanded as:

$$I(Q) = I_0 \exp\left(-\frac{Q^2 R_g^2}{3}\right) \quad (1)$$

where  $I_0$  is the forward scattered intensity,  $Q$  the scattering variable and  $R_g$  the radius of gyration. The Guinier analysis involves plotting  $\ln(I(Q))$  vs  $Q^2$ : a linear fit gives  $R_g$  and  $I_0$  from the slope and intercept, respectively. The  $R_g$  represents the effective size of the scattering "particle", while  $I_0$  can be used to estimate the molecular weight of the "particle" (2). The usefulness of this plot stems from the fact that the obtained particle "size"  $R_g$  is independent of the absolute intensity  $I_0$  and of any model. Because the Guinier approximation is valid only in the region where  $Q \cdot R_g \cong 1$  (see **Supplementary Table 1**), only the low  $Q$  range was considered. The scattering data were reduced and analyzed using a macro written by Oakridge National Laboratory using Igor Pro (Wavemetrics Inc., Portland, OR).

The  $I_0$  is used to determine the molecular weight (MW) of the molecule in solution using the following equation:

$$I(0) = c M_w (\Delta\rho)^2 v^2 / N_A \quad (2)$$

where  $c$  is the concentration of protein (g/ml),  $M_w$  is the molecular weight,  $\Delta\rho$  is the contrast of the scattering length density between the protein and the solvent and is  $3.4 \times 10^{10} \text{ cm}^{-2}$  for  $\text{D}_2\text{O}$ ,  $v$  is the partial specific volume of protein and is  $0.73 \text{ cm}^3/\text{g}$  and  $N_A$  is Avogadro's number. Two additional scale factors were applied to  $I(0)$ , including the absolute scale factor for the detector distance used, which was  $1.4462 \times 10^{-5}$  and multiplied the value of  $I(0)$ , and the sample thickness of 0.2 cm was used to divide  $I(0)$ .

## References

1. Guinier, A. and G. Fournet, *Small-angle scattering of x-rays*. 1955, New York: Wiley.
2. Jacrot, B. and G. Zaccai, *Determination of molecular weigh by neutron scattering*. *Biopolymers*, 1981. **20**: p. 2413-2426.

**Supplementary Table 1: Parameters of the Guinier analysis**

| Sample                  | $R_g \times Q$ min | $R_g \times Q$ max |
|-------------------------|--------------------|--------------------|
| Native pH 1.6           | 0.4                | 1.5                |
| I <sub>F</sub> ,        | 1.2                | 1.4                |
| I <sub>F</sub> ,        | 0.9                | 1.2                |
| I <sub>F</sub> Filtered | 0.3                | 1.0                |

## Supplementary Figures

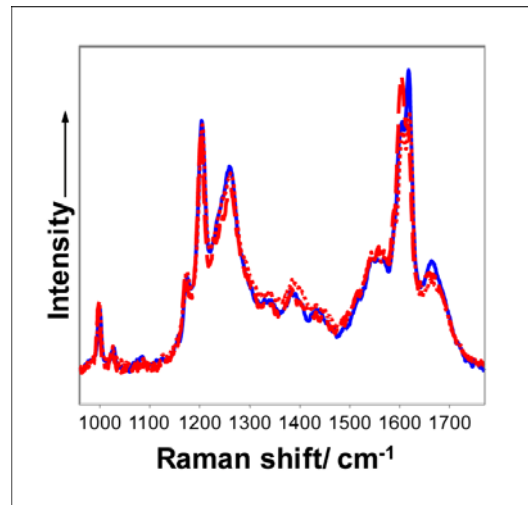

**Supplementary Figure 1: DUVRR of insulin at pH 11.** The secondary structure of insulin that had been in fibrils (I<sub>F</sub> – dotted red line) was compared with native insulin (solid blue line) that had not previously been in fibrils (I<sub>N</sub> – dashed red line) and no difference was found.

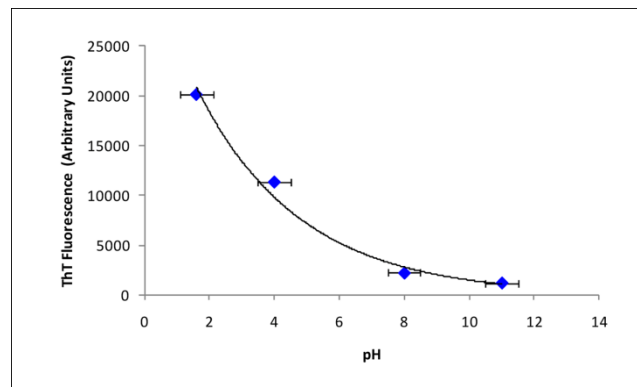

**Supplementary Figure 2: Change in ThT fluorescence with pH.** ThT is pH sensitive: It has a high signal at pH 2 and is greatly reduced at pH 11.

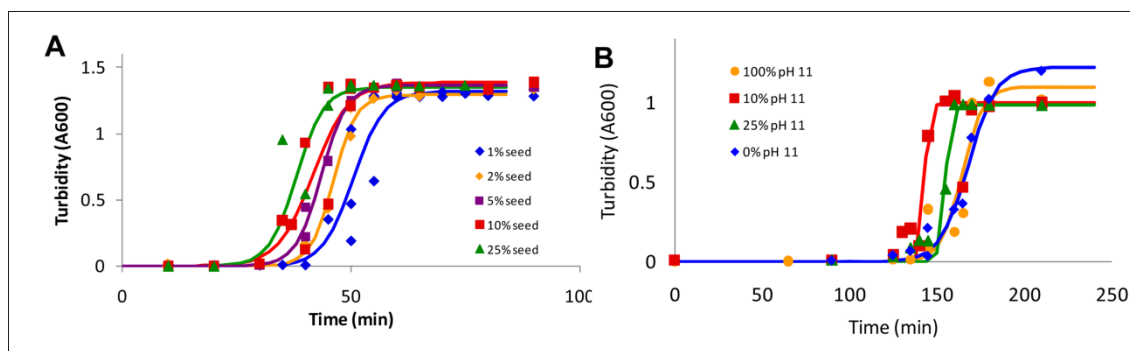

**Supplementary Figure 3: The seeding effect of disaggregated and pH cycled insulin.** (A) Disaggregated insulin ( $I_F'$ ) seeds a kinetic run in a dose dependent manner, whereas (B) insulin that was pH cycled ( $I_N'$ ) does not seed the reaction. Note that the time axes are on a different scale.

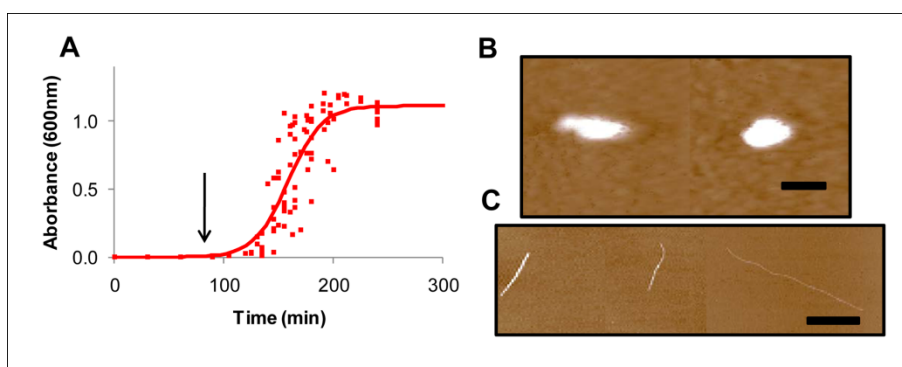

**Supplementary Figure 4: Images of aggregates and fibrillar aggregates in lag time samples from native insulin.** (A) Samples were taken at 75 minutes into the fibrillation run and imaged with AFM. (B) Aggregates similar in size to those found in the disaggregated fibril samples (Fig. 4C) and (C) fibrils were found in the samples. Scale bars are 100 nm in B and 500 nm in C.

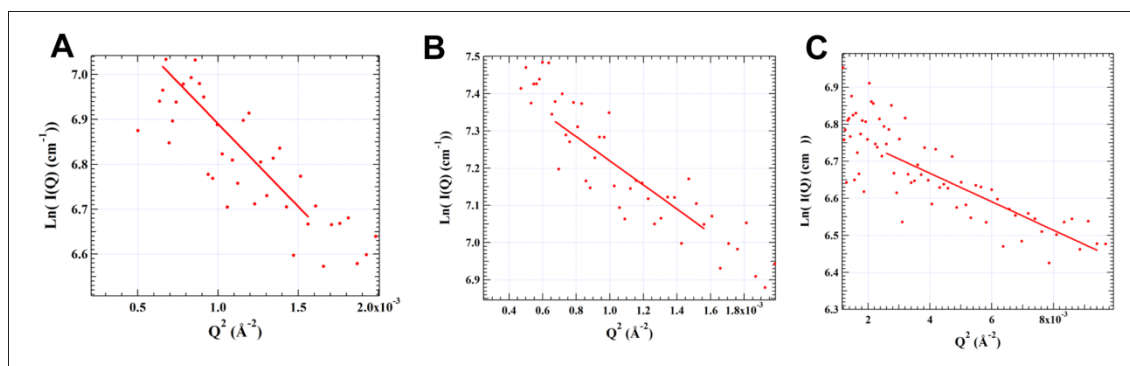

**Supplementary Figure 5: The Guinier analysis of SANS data.** (A) pH 11 disaggregated insulin ( $I_F$ ), (B) pH 1.6 disaggregated insulin ( $I_F'$ ), and (C) pH 1.6 disaggregated insulin that was filtered with a 0.22  $\mu\text{m}$  filter.

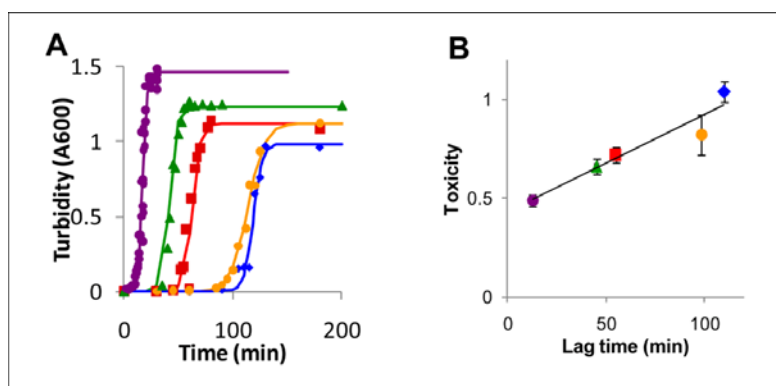

**Supplementary Figure 6: Dose response of retentate seeding.** (A) Seeding of a 2 mg/ml insulin run at 65°C and pH 1.6 with 1% of fibrils (purple squares), retentate (green triangles), retentate diluted 1:10 (red squares), retentate diluted 1:80 (orange circles) and no seeding (blue diamonds). (B) When the MTT reduction on PC-12 cells of each sample was compared to the lag time of that sample, there was a linear correlation with an  $R^2$  of 0.91.
